# Supplementary material for: Assembly and early maturation of large subunit precursors
Source: PubMed Central journal article supplement — RNA. 2019 Apr;25(4):465–71. doi: 10.1261/rna.069799.118 (PMC6426289; doi:10.1261/rna.069799.118), 2019-04
Supplement: supp_069799.118_Supplemental_Material.pdf [file supp_069799.118_Supplemental_Material.pdf]

Supplemental material accompanying:

**Assembly and early maturation of large subunit precursors**

Malik Chaker-Margot<sup>1,2</sup> and Sebastian Klinge<sup>1</sup>.

1. Laboratory of Protein and Nucleic Acid Chemistry, The Rockefeller University, New York, NY, US

2. Tri-Institutional Training Program in Chemical Biology. The Rockefeller University, New York, NY, US

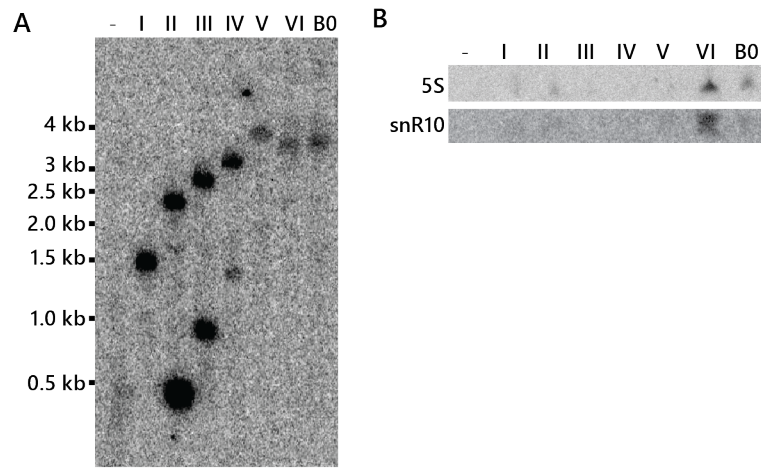

**Supplemental Figure 1. RNA analysis of pre-ribosomal complexes.** (A) Northern blot with MS2 probe of total RNA extracted from cells where truncated pre-rRNA were expressed. (B) Northern blot with 5S and snR10 probes of RNA extracted from purified pre-ribosomal complexes.

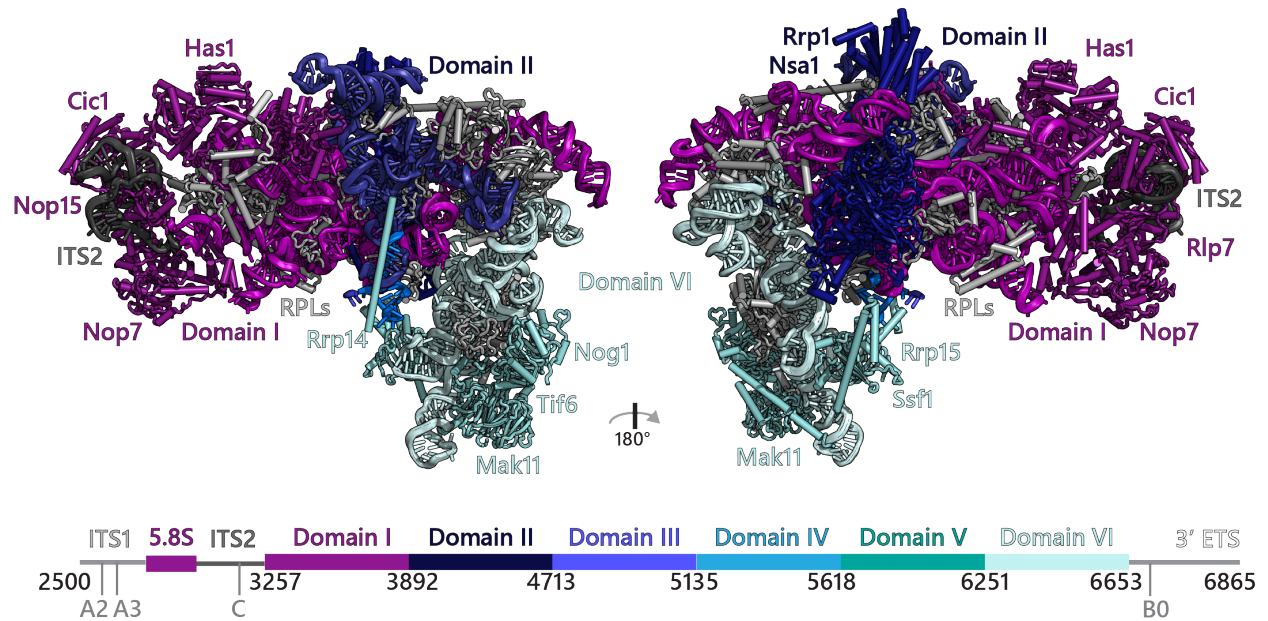

**Supplemental Figure 2. Mapping the recruitment of large subunit assembly factors on the nucleolar pre-60S particles.** Model of state 2 of the nucleolar pre-60S particles (PDB 6C0F) (Sanghai et al. 2018) where the assembly factors are colored according to the stage to which they are recruited. Ribosomal proteins are shown in grey.
